# Supplementary material for: Identification of the Combining Ability of Grain Yield and Its Components in Hybrid Barley (Hordeum Vulgare L.) Populations Based on Top Cross Analysis
Source: Research Square preprint supplement (doi:10.21203/rs.3.rs-568905/v1), 2021-06-23
Supplement: Supplementary file 1 [file 8bc158fc356446f2dbf76862.xlsx]

## Sheet: Лист1
					TABLE 4 Estimates of the GCA effects and variance of the SCA of varieties by traits of productivity, depending on the testing sites
							Number of grains perspike		Thousand grain weight		Grain weight pers pike
					Lines, varieties	Site	GCA	SCA	GCA	SCA	GCA	SCA
					WI2291/Roho/WI2269	А	-5.6	0.127	-0.25	59.4	-3	1.42
						В	+ 8.3	4.1	+ 5.8	18.9	2	3.13
					WI2291*2/WI2269	А	4	6.4	-3.9	158.3	+ 1.7	0.52
						В	-3.3	1.2	+ 1.2	3	-2.7	1.21
					Rihane	А	-1.9	32	+ 4.5	55.3	-0.2	0.56
						В	+ 4.2	2.5	+ 1.7	6.9	2	1.2
					Harmal	А	+ 3.5	71.9	-0.31	36.1	+ 1.5	1.76
						В	-9.2	1	-8.7	32.9	-1.3	-0.38
					LSD05 (least significant difference)		3.4	38.1	4.5	36.5	1.5	1.46
					Saule	А	-5.7	41.1	-3.8	95.5	-2.3	1.11
						В	1	-0.85	-3	23.9	1	0.94
					Donetskiy 8	А	-1.6	1.07	+ 0.39	25.8	-0.4	0.07
						В	-2	17.3	-1	24.5	-2.5	0.53
					Odessa 100	А	+ 7.3	31.1	+ 3.37	51.6	+ 2.7	1.39
						В	1	0.56	4	10.1	+ 1.5	0.95
					LSD05 (least significant difference)		4.9	31.6	2.6	45.2	1.2	0.73
					Note: Sites: A – Kyzylorda region; B – Almaty region
