# Supplementary material for: Identification of the Combining Ability of Grain Yield and Its Components in Hybrid Barley (Hordeum Vulgare L.) Populations Based on Top Cross Analysis
Source: Research Square preprint supplement (doi:10.21203/rs.3.rs-568905/v1), 2021-06-23
Supplement: Supplementary file 2 [file 9155efc2eb7ec0591a5bc7f1.xlsx]

## Sheet: Лист1
					TABLE 3 Estimates of the GCA effects and variance of the SCA of varieties by morpho-biological traits, depending on the testing sites
					Lines, varieties	Site	Plant height		Spike length		The length of the growing season
							GCA	SCA	GCA	SCA	GCA	SCA
					WI2291/Roho/WI2269	А	-8.6	30.93	-2.5	4.9	-2		95.2
						В	-12.4	280.5	+ 0.3	-0.9	-4		125.2
					WI2291*2/WI2269	А	+ 0.2	-4.4	+ 1.3	7.1	1		71.3
						В	+ 4.4	123.2	-2.6	0.5	3		101.3
					Rihane	А	-6.6	160.9	-1.8	4.7	-10.5		160.5
						В	-1.4	270.1	1	16.9	-7.5		190.5
					Harmal	А	15	210.5	3	2.8	+ 3.5		125
						В	+ 9.4	164.5	+ 1.3	2.5	+ 8.5		155.5
					LSD05 (least significant difference)		7.8	146.7	2.9	8.7	5		63.3
					Saule	А	-3.4	23.3	-1	3.8	-3		135.7
						В	+ 1.6	46.7	-1	2.6	-3		165.5
					Donetskiy8	А	-2.4	50.2	-1.2	2.8	+ 10.4		71
						В	-4	141.9	2	2.7	+ 0.6		101.6
					Odessa 100	А	+ 5.8	136.6	+ 2.2	6.2	+ 0.6		72.4
						В	+ 2.4	142	-1	5.8	+ 2.4		102.3
					LSD05 (least significant difference)		2.1	82	0.9	2.9	7.6		73.6
					Note: Sites: A – Kyzylorda region; B – Almaty region
